# Supplementary material for: Ancient coexistence of norepinephrine, tyramine, and octopamine signaling in bilaterians
Source: PubMed Central journal article supplement (PMC5282848; doi:10.1186/s12915-016-0341-7), 2017-01-30

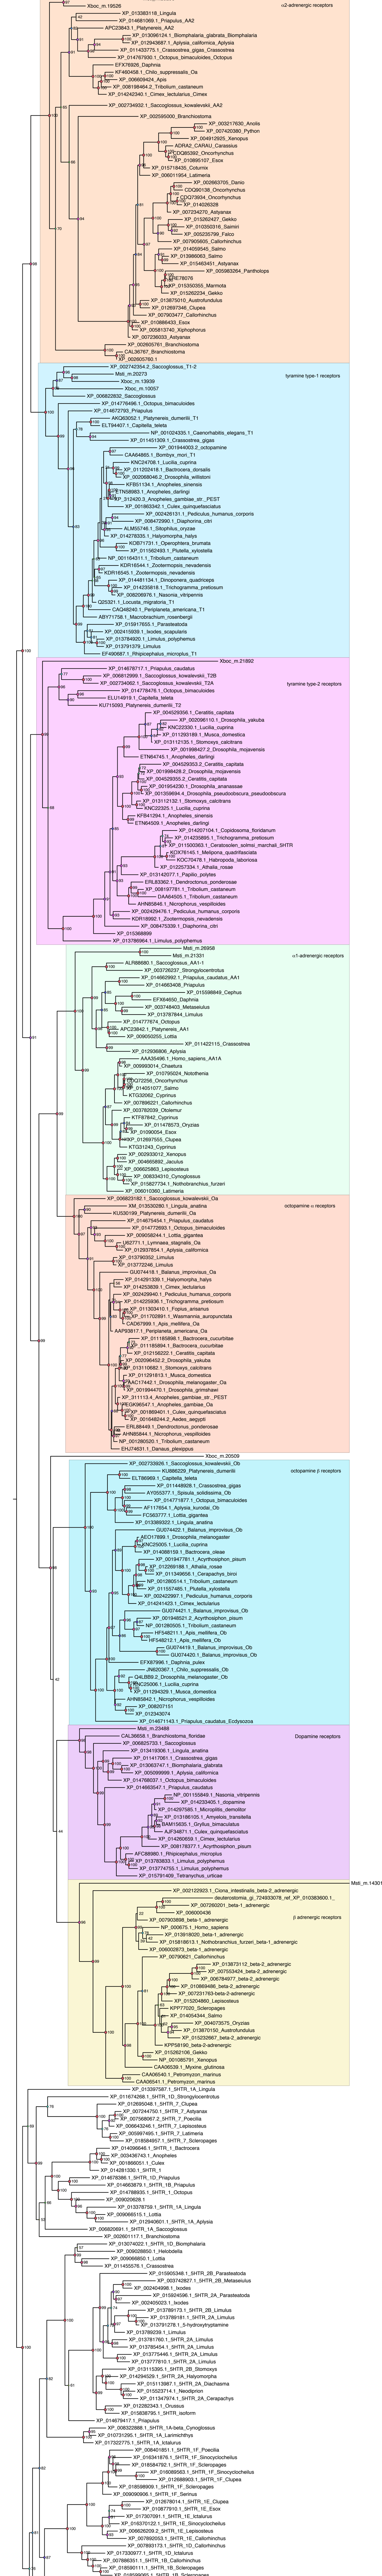

Supplement: 12915_2016_341_MOESM1_ESM.pdf [file 12915_2016_341_MOESM1_ESM.pdf]
